# Supplementary material for: Early Transcriptomic Response to Phosphate Deprivation in Soybean Leaves as Revealed by RNA-Sequencing
Source: MDPI journal article supplement (doi:10.3390/ijms19072145), 2018-07-23
Supplement: s1 [file s1]

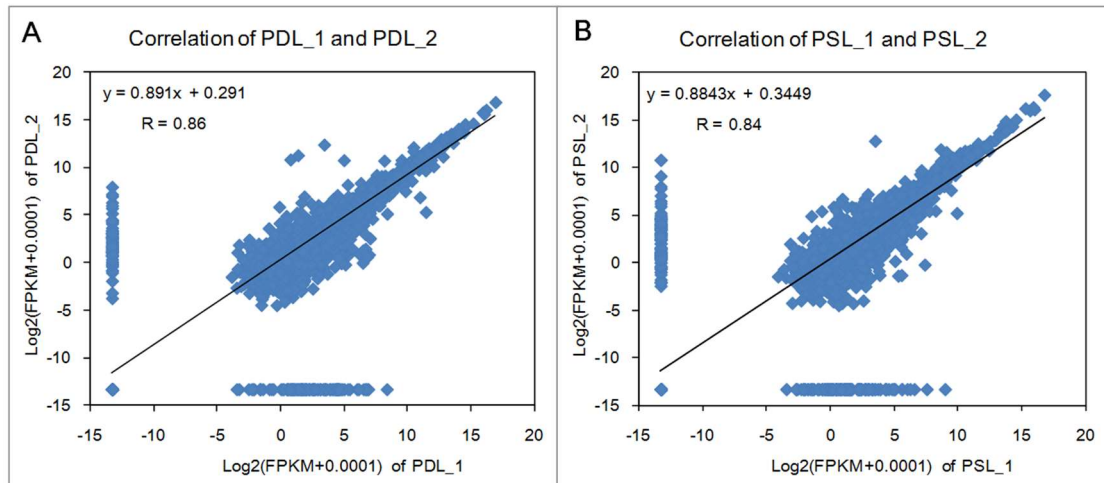

**Figure S1.** Pearson's correlation (R value) of two biological replicates. A, two biological replicates of Pi-deprived leaves (PDL\_1 and PDL\_2). B, two biological replicates of Pi-sufficient leaves (PSL\_1 and PSL\_2).

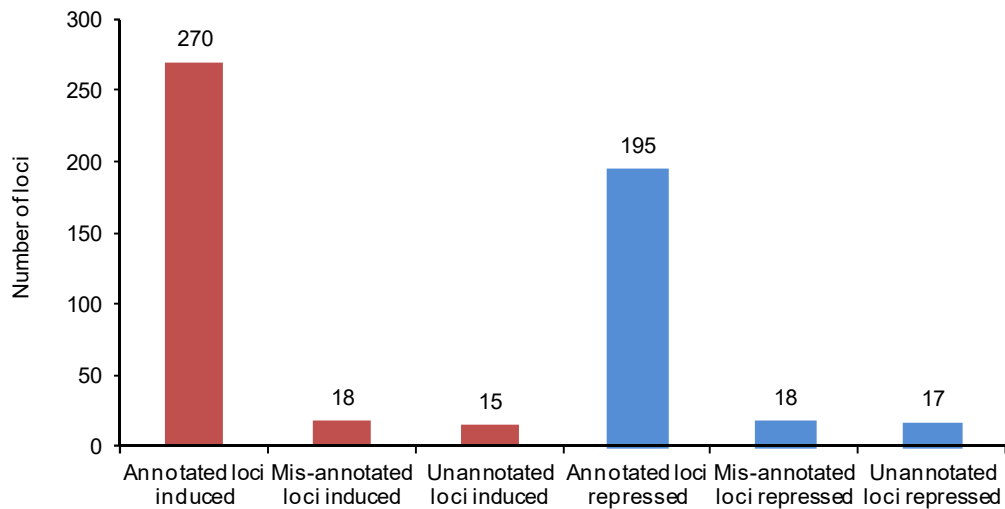

**Figure S2.** Histogram representing the differentially expressed genes between Pi-deprived and Pi-sufficient leaves. Red and blue colors indicate up- and down-regulated genes, respectively, under Pi deprivation.

MYAECKKI KERQIQEWQCYXINXKIMKKRIVKQXACCTIQICTIDRRHVIKDESRMI DNCTEKTUVEIIEQQC

SPX

...T I A S R T A K I G E F H E V T Q C F P H I S R T A F E I R F A Y R A V G O F I L K I I F F E V M N A M G I R K T I I K K E D K P E G Y K E T D Y Y V K T R A N H P

MFS

PVDFRVDFOSSYHEMSIETLNLANTEIYMVNTYITIVPTADDYSMSI GAAPTVCGITVIGAMAVAQOVFESSVYE

MFS

SAWSNPSYTRPIESSTVLEIGNVIYALAYDINSTWIIITGRIICGEGSARAVNRPRTSDCVPIKTRMOASAGEFVSASAI

MFS

GMACGPALAGLIQTNEKTFENTENODTLPGLMTIAWLIYILVWLIWITEKEPYREITEFEKHVPHQS-----NAEENN-AI

MFS

DSHQPANSTGAAYRIITPSVKVQLITYFMIKYAMEIITSESSVITTY

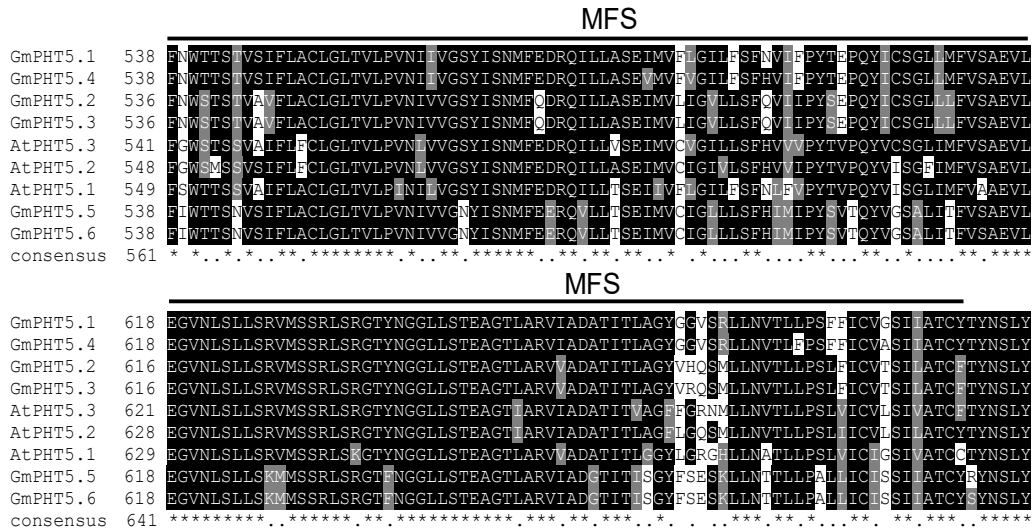

**Figure S3.** Alignment of the amino acid sequences of the six soybean SPX-MFS proteins and the three Arabidopsis SPX-MFS proteins with ClustalW (<http://www.genome.jp/tools/clustalw/>) and BoxShade ([http://www.ch.embnet.org/software/BOX\\_form.html](http://www.ch.embnet.org/software/BOX_form.html)). Black blocks indicate highly conserved residues. Dashes indicate gaps introduced to allow for optimal alignment of the sequences. The SPX domain and the MFS domain are indicated by lines.

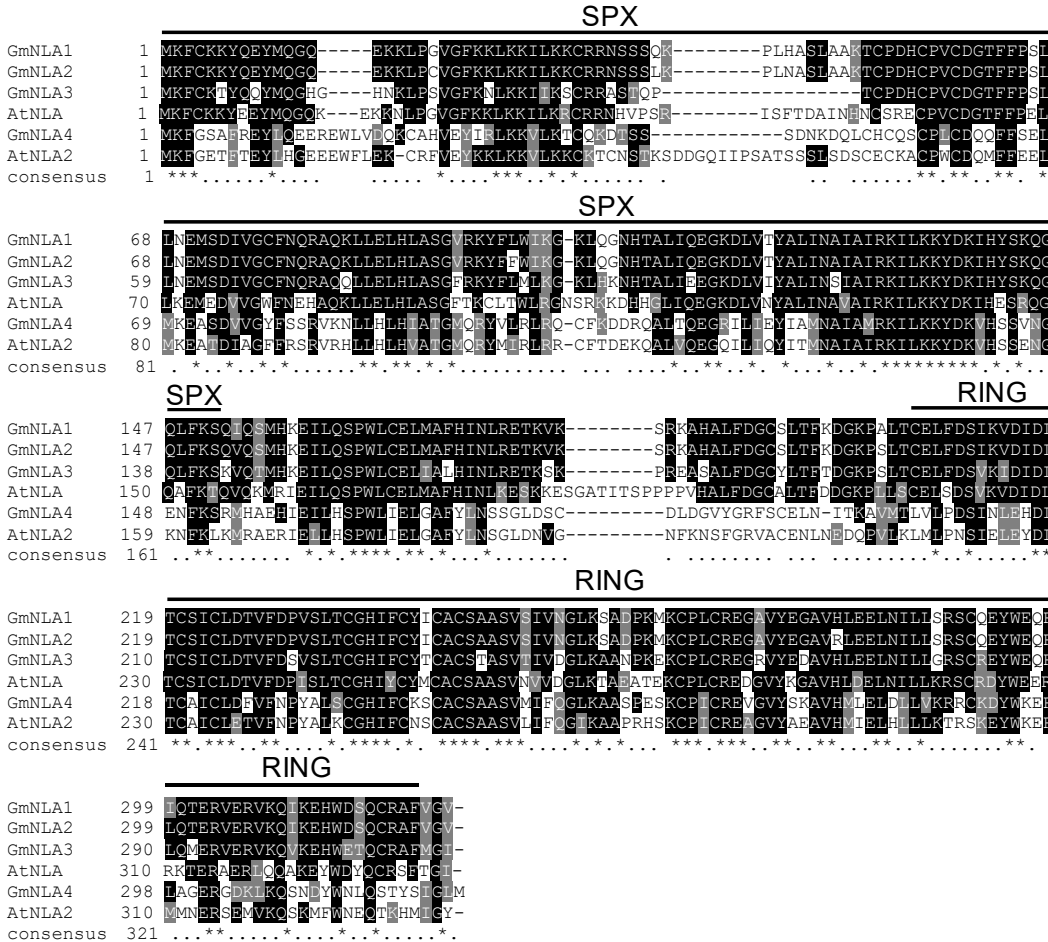

**Figure S4.** Alignment of the amino acid sequences of the four soybean SPX-RING proteins and the two Arabidopsis SPX-RING proteins with ClustalW (<http://www.genome.jp/tools/clustalw/>) and BoxShade ([http://www.ch.embnet.org/software/BOX\\_form.html](http://www.ch.embnet.org/software/BOX_form.html)). Black blocks indicate highly conserved residues. Dashes indicate gaps introduced to allow for optimal alignment of the sequences. The SPX domain and the RING domain are indicated by lines.

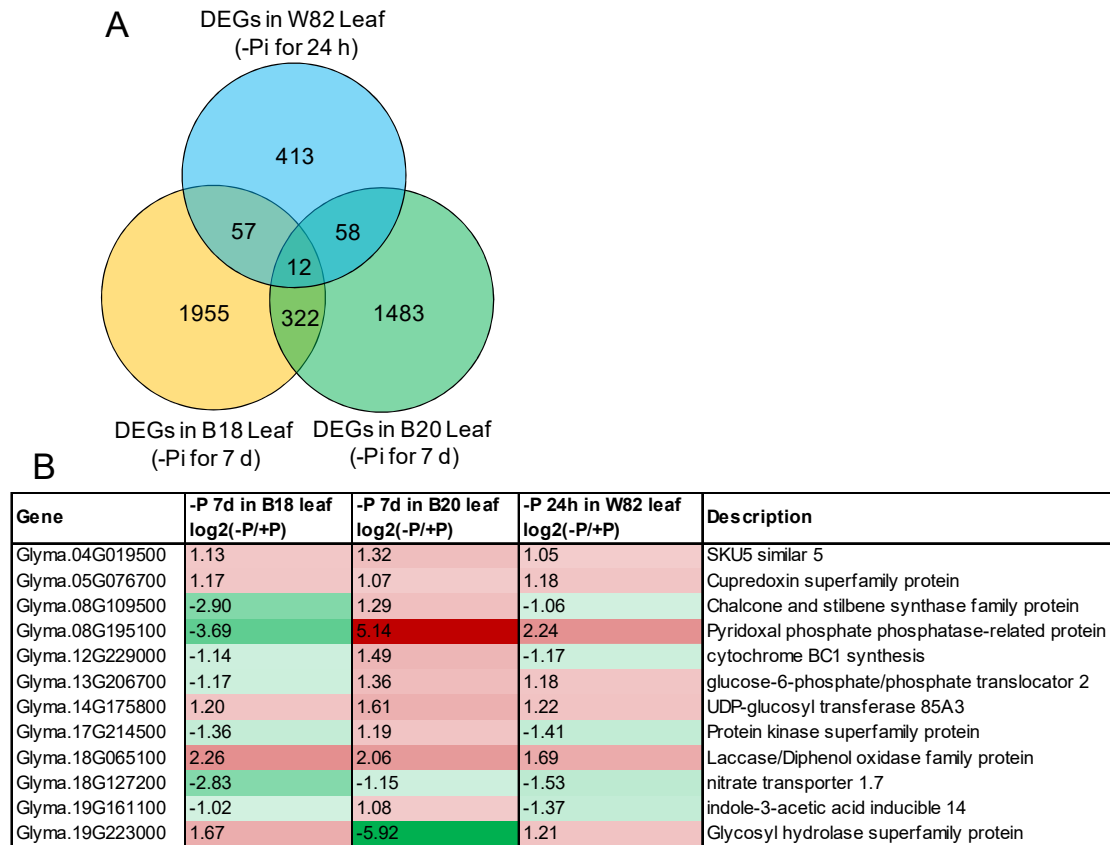

**Figure S5.** Genes that are common responsive to short-term Pi deprivation (24 h) and long-term Pi deprivation (7 d) in soybean leaves of different genotypes. B20 is a low-P tolerant genotype, while B18 is a low-P sensitive genotype (Zhang et al 2017 Plant Mol Biol 93:137-150). Soybean cultivar Williams 82 (W82) was used in this study. (A) Venn diagram illustrating 12 common differentially expressed genes (DEGs) in the three genotypes. (B) List of the 12 common DEGs in the three genotypes under short-term or long-term Pi deprivation.

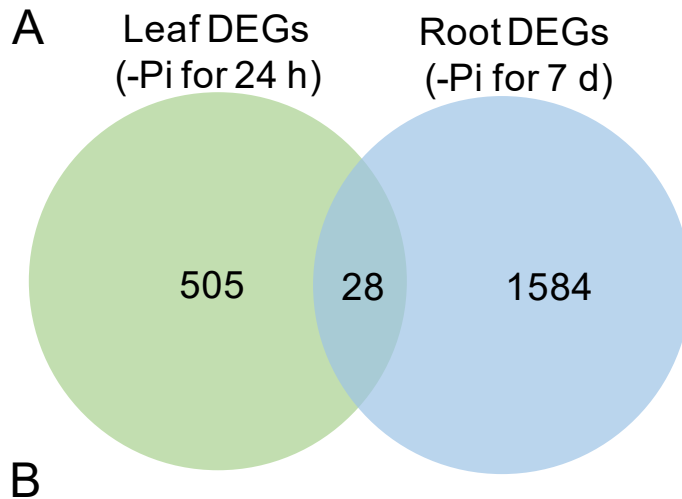

**B**

| Gene            | -P 24 h in leaf<br>Log2(-P/+P) | -P 7 d in root<br>Log2(-P/+P) | Description                                        |
|-----------------|--------------------------------|-------------------------------|----------------------------------------------------|
| Glyma.17G122900 | 8.65                           | -2.52                         | NA                                                 |
| Glyma.19G098500 | 3.85                           | 1.70                          | Senescence-related gene 3                          |
| Glyma.11G046700 | 2.79                           | -1.98                         | NA                                                 |
| Glyma.04G147600 | 2.76                           | 4.63                          | SPX domain gene 2                                  |
| Glyma.12G065500 | 2.63                           | 3.67                          | NA                                                 |
| Glyma.13G113000 | 2.32                           | -P only                       | NA                                                 |
| Glyma.20G238000 | 1.89                           | 2.26                          | Phospholipase D P1                                 |
| Glyma.08G203700 | 1.81                           | -3.48                         | Isochorismatase family protein                     |
| Glyma.04G247800 | 1.70                           | -4.84                         | Response regulator 9                               |
| Glyma.12G037300 | 1.36                           | -3.45                         | NA                                                 |
| Glyma.10G194000 | 1.34                           | -6.85                         | UDP-Glycosyltransferase superfamily protein        |
| Glyma.08G154800 | 1.24                           | 2.72                          | Putative methyltransferase family protein          |
| Glyma.19G145700 | 1.08                           | -P only                       | Pectin lyase-like superfamily protein              |
| Glyma.09G223700 | 1.03                           | 2.05                          | Phosphate starvation-induced gene 3                |
| Glyma.17G159100 | -7.43                          | -2.88                         | NA                                                 |
| Glyma.19G148400 | -3.67                          | -P only                       | NA                                                 |
| Glyma.07G094000 | -2.77                          | 5.04                          | ATP-binding cassette A2                            |
| Glyma.13G004400 | -2.55                          | -1.11                         | Zinc transporter 5 precursor                       |
| Glyma.05G176900 | -1.91                          | -P only                       | NA                                                 |
| Glyma.16G131200 | -1.58                          | -3.16                         | Ferulic acid 5-hydroxylase 1                       |
| Glyma.11G074100 | -1.37                          | -2.03                         | Ferulic acid 5-hydroxylase 1                       |
| Glyma.13G232800 | -1.30                          | -4.12                         | RING/U-box superfamily protein                     |
| Glyma.17G072200 | -1.09                          | -1.12                         | Cellulose synthase family protein                  |
| Glyma.03G145600 | -1.06                          | -1.32                         | Peroxidase 2                                       |
| Glyma.16G178800 | -1.05                          | 2.57                          | Heat shock protein 90.1                            |
| Glyma.17G165200 | -1.02                          | -2.37                         | Natural resistance-associated macrophage protein 3 |
| Glyma.06G158800 | -1.01                          | -1.16                         | Eukaryotic aspartyl protease family protein        |
| Glyma.14G222700 | -1.01                          | -1.78                         | Prolyl oligopeptidase family protein               |

**Figure S6.** Soybean genes that are common responsive to short-term Pi deprivation (24 h) in leaves in this study and long-term Pi deprivation (7 d) in roots in previous study (Zeng et al 2016 Plant and soil 398: 207-27). **(A)** Venn diagram illustrating 28 common differentially expressed genes (DEGs) in leaves and roots. **(B)** List of the common DEGs.
